# Supplementary material for: Facile synthesis of novel CuCo2S4 nanospheres for coaxial fiber supercapacitors
Source: Royal Society of Chemistry journal article supplement (doi:10.1039/c7ra04532h), 2017-01-01
Supplement: c7ra04532h1.pdf [file c7ra04532h1.pdf]

Supporting Information

### Facile synthesis of novel $\text{CuCo}_2\text{S}_4$ nanospheres for coaxial fiber supercapacitors

Qiufan Wang, Xiao Liang, Depeng Yang, Daohong Zhang\*

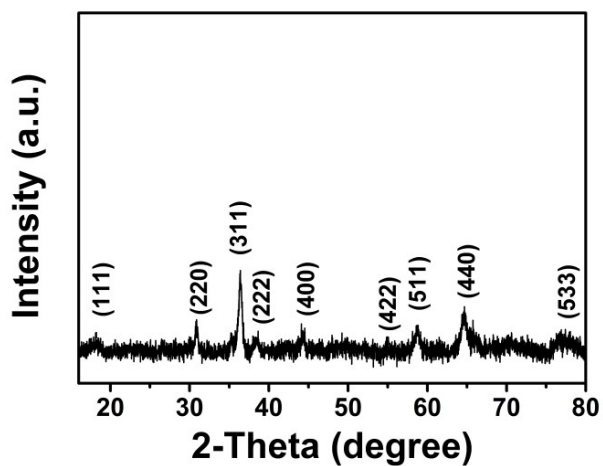

Figure S1. XRD pattern of as-fabricated  $\text{CuCo}_2\text{O}_4$  sample.

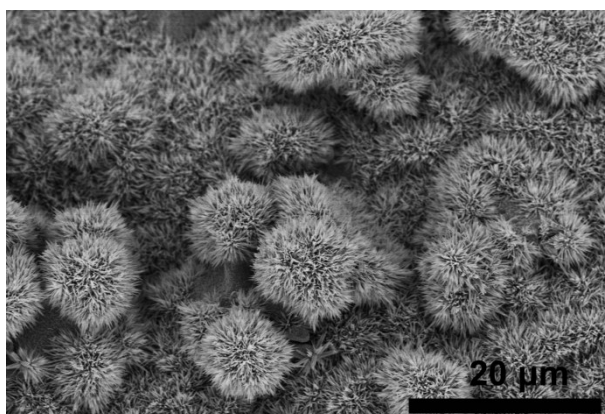

Figure S2. The SEM of the  $\text{CuCo}_2\text{O}_4$  when the urea is 7 mmol.

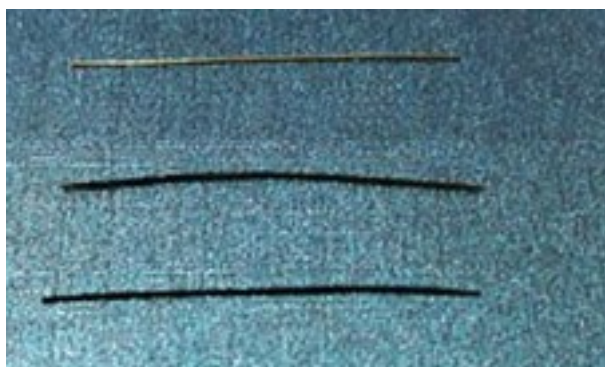

Figure S3. The photos of pure Ti wire,  $\text{CuCo}_2\text{O}_4/\text{Ti}$  and  $\text{CuCo}_2\text{S}_4/\text{Ti}$ , respectively.

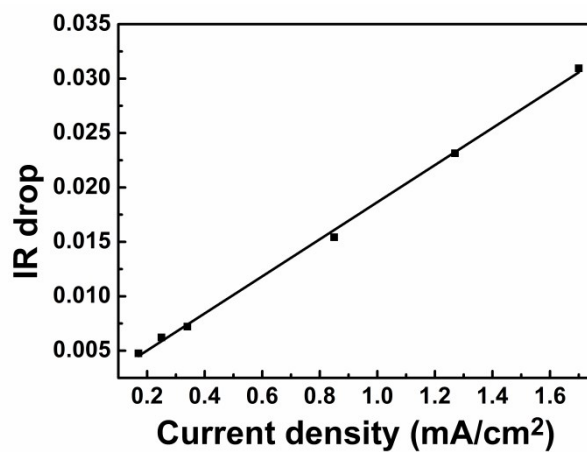

Figure S4. IR drop as a function of current density.

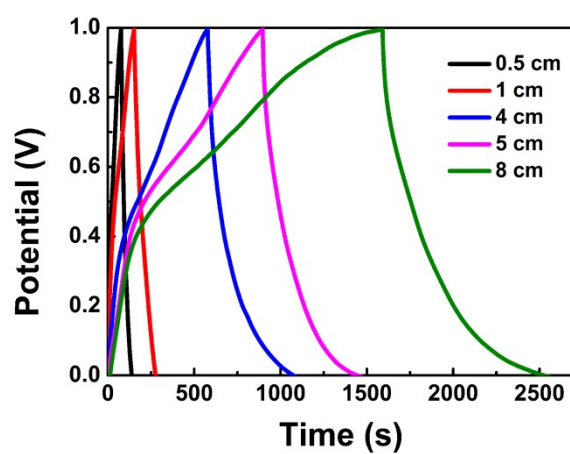

Figure S5. The galvanostatic charge-discharge curves of the fiber SC with different length.

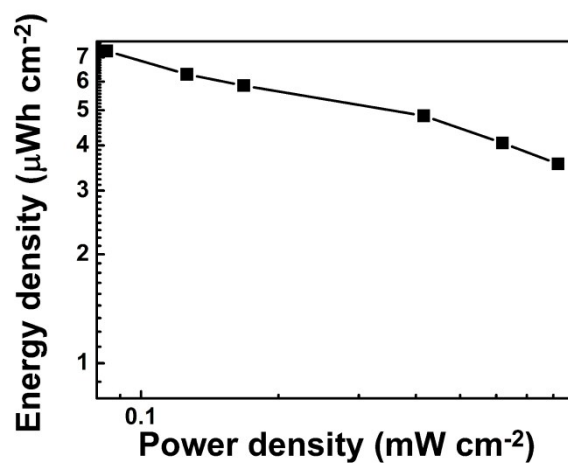

Figure S6. Ragone plot.
